# Supplementary material for: Multi-level meta-workflows: new concept for regularly occurring tasks in quantum chemistry
Source: Springer Nature journal article supplement (doi:10.1186/s13321-016-0169-8), 2016-10-20
Supplement: 13321_2016_169_MOESM1_ESM.pdf [file 13321_2016_169_MOESM1_ESM.pdf]

## Multi-level Meta-workflows: New Concept for Regularly Occurring Tasks in Quantum Chemistry

Junaid Arshad,<sup>a</sup> Alexander Hoffmann,<sup>b</sup> Sandra Gesing,<sup>c</sup> Richard Grunzke,<sup>d</sup> Jens Krüger,<sup>e</sup> Tamas Kiss,<sup>a</sup> Sonja Herres-Pawlis,<sup>b\*</sup> Gabor Terstyanszky<sup>a\*</sup>

<sup>a</sup> Centre for Parallel Computing, School of Electronics and Computer Science  
University of Westminster, 115 New Cavendish Street, London W1W 6UW, UK.  
terstyg@westminster.ac.uk

<sup>b</sup> Institut für Anorganische Chemie, Lehrstuhl für Bioanorganische Chemie, RWTH Aachen University, Landoltweg 1, 52074 Aachen, Germany, sonja.herres-pawlis@ac.rwth-aachen.de

<sup>c</sup> University of Notre Dame, 123 Information Technology Center, Notre Dame, IN 46556, USA

<sup>d</sup> Center for Information Services and High Performance Computing, Technische Universität Dresden, Zellescher Weg 12-14, 01062 Dresden, Germany

<sup>e</sup> Applied Bioinformatics Tübingen, University of Tübingen, Sand 14, 72076 Tübingen, Germany

| name                          | functionality                              |
|-------------------------------|--------------------------------------------|
| atomic workflows              |                                            |
| Opt WF                        | geometry optimization                      |
| Basic Opt WF                  | geometry optimization with small basis set |
| Freq WF                       | frequency calculation                      |
| TD WF                         | time-dependent DFT calculation             |
| Pop WF                        | population analysis                        |
| Solv WF                       | optimization in solvent                    |
| meta-workflows                |                                            |
| Spec M-WF                     | spectroscopic analysis                     |
| Spec-Bench M <sup>2</sup> -WF | spectroscopic benchmarking                 |
|                               |                                            |

**Table S1: Spectroscopic simulation workflows (Fig. 6 and 7)**

| name                    | functionality             |
|-------------------------|---------------------------|
| <b>atomic workflows</b> |                           |
| <b>Opt WF</b>           | geometry optimization     |
| TD-B3LYP WF             | TD calculation with B3LYP |
| TD-PW91 WF              | TD calculation with PW91  |
| TD-TPSSh WF             | TD calculation with TPSSh |
| TD-PBE WF               | TD calculation with PBE   |
| <b>meta-workflows</b>   |                           |
| Opt_Bench M-WF          | optical benchmarking      |

**Table S2: Optical benchmarking workflows (Fig. 8)**

| name             | Functionality                                     |
|------------------|---------------------------------------------------|
| atomic workflows |                                                   |
| B3LYP-2 WF       | geometry optimization with B3LYP and 2z basis set |
| B3LYP-3 WF       | geometry optimization with B3LYP and 3z basis set |
| TPSSh-2 WF       | geometry optimization with TPSSh and 2z basis set |
| TPSSh-3 WF       | geometry optimization with TPSSh and 3z basis set |
| meta-workflows   |                                                   |
| Geo_Opt M-WF     | geometry optimization benchmarking                |

**Table S3: Structural benchmarking workflows (Fig. 9)**

| name                            | functionality                                                       |
|---------------------------------|---------------------------------------------------------------------|
| atomic workflows                |                                                                     |
| B3LYP-2 Solv WF                 | geometry optimization with B3LYP and 2z basis set and solvent model |
| B3LYP-2 Disp WF                 | geometry optimization with B3LYP and 2z basis set and dispersion    |
| B3LYP-3 Solv WF                 | geometry optimization with B3LYP and 3z basis set and solvent model |
| B3LYP-3 Disp WF                 | geometry optimization with B3LYP and 3z basis set and dispersion    |
| TPSSh-2 Solv WF                 | geometry optimization with TPSSh and 2z basis set and solvent model |
| TPSSh-2 Disp WF                 | geometry optimization with TPSSh and 2z basis set and dispersion    |
| TPSSh-3 Solv WF                 | geometry optimization with TPSSh and 3z basis set and solvent model |
| TPSSh-3z Disp WF                | geometry optimization with TPSSh and 3z basis set and dispersion    |
| meta-workflows                  |                                                                     |
| Struct_Bench M <sup>2</sup> -WF | structural benchmarking                                             |

**Table S4: Structural benchmarking workflows (Fig. 10)**

| name                         | functionality                    |
|------------------------------|----------------------------------|
| atomic workflows             |                                  |
| <b>Opt WF</b>                | geometry optimization            |
| <b>Freq WF</b>               | frequency calculation            |
| OptDisp WF                   | dispersion optimization          |
| FreqDisp WF                  | frequency-dispersion calculation |
| meta-workflows               |                                  |
| Freq_Displ_Opt M-WF          | gas phase optimization           |
| Freq_Solv_Opt M-WF           | solvent phase optimization       |
| Struc_Opt M <sup>2</sup> -WF | structural optimization          |

**Table S5: Structural benchmarking workflows (Fig. 11)**

| name                           | functionality                                      |
|--------------------------------|----------------------------------------------------|
|                                | atomic workflows                                   |
| <b>Opt WF</b>                  | geometry optimization                              |
| Freq-0K WF                     | frequency calculation at 0 K                       |
| Freq-400K WF                   | frequency calculation at 400 K                     |
|                                | meta-workflows                                     |
| Equil_Calc M-WF                | Structure optimization for equilibrium calculation |
| Opt plus 2 Freq M-WF           | temperature-dependent energies calculation         |
| Equil_Solv M <sup>2</sup> -WF  | Structure optimization in different solvents       |
| Equil_Energ M <sup>3</sup> -WF | Combination for all complexes in equilibrium       |

**Table S6: Inorganic polymerization catalysis workflows (Fig. 14 and 15)**
